# Supplementary material for: Designed double layer assembly: a three-dimensional open framework with two types of cavities by connection of infinite two-dimensional bilayerElectronic supplementary information (ESI) available: asymmetric unit of 1, TGA, XRPD, fluorescence spectrum of 1. See http://www.rsc.org/suppdata/cc/b3/b313364h/
Source: Royal Society of Chemistry journal article supplement (doi:10.1039/b313364h), 2004-01-01
Supplement: b313364h.pdf [file b313364h.pdf]

Supporting Information for “Designed double layer assembly: a three-dimensional open framework with two types of cavities by connection of infinite two-dimensional bilayer, Xinlong Wang, Chao Qin, Enbo Wang,\* Yangguang Li, Changwen Hu and Lin Xu, *Chemical Communications*”

SI 1: asymmetric unit of 1

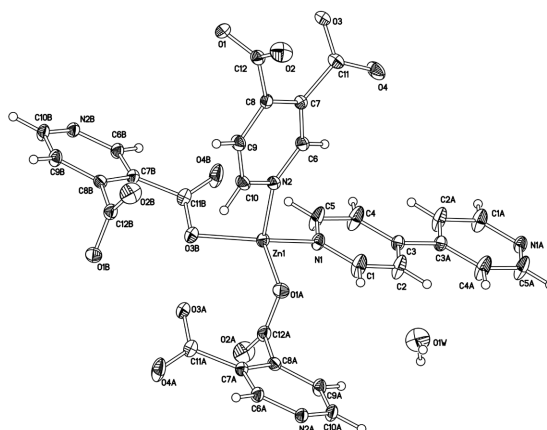

SI 2: TGA curve of 1

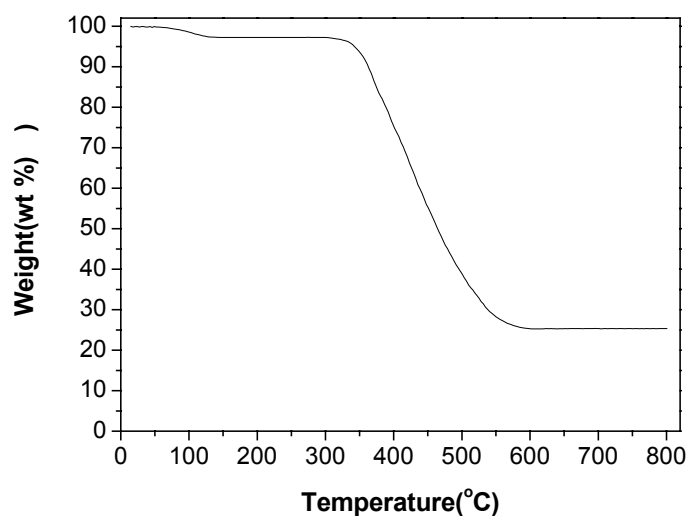

Thermogravimetric analysis (TGA) was performed in air at a heating rate of 10°C/min on a polycrystalline sample of compound 1. The result showed that the first weight loss of 2.71% occurred between 60°C and 120°C, corresponding to the removal of the guest water molecules (Calcd 2.83%). The second weight loss starts at ca. 332°C up to 590°C corresponding to the release of organic groups. The remaining weight of 25.34% corresponds to the percentage (25.51%) of Zn and O components, indicating that the final product is ZnO.

### SI 3: Fluorescence Spectrum of **1**

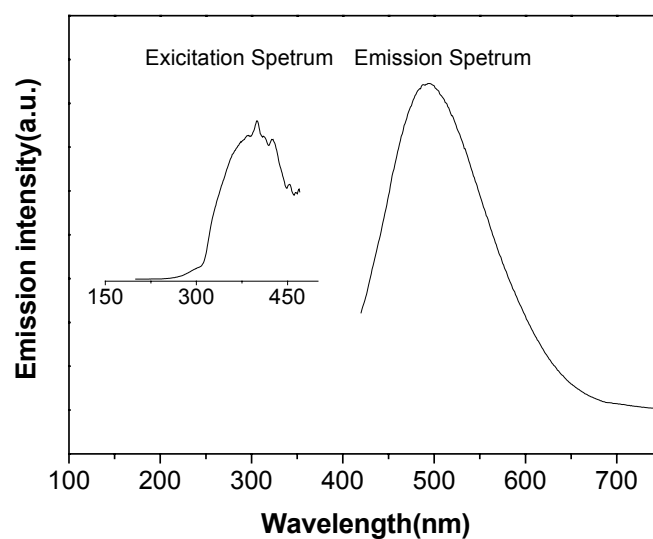

The emission spectrum of compounds **1** in solid state at room temperature shows that an intense emissions occurring at 497nm ( $\lambda_{\text{ex}}=399$  nm). According to the previous literature, 4,4'-bpy does not emit any luminescence in the range 300-700 nm. In order to understand the nature of the emission band, we analyzed the photoluminescence property of H<sub>2</sub>PDB ligand and found that the strongest emission peak for H<sub>2</sub>PDB is at about 370 nm which is attributable to the  $\pi^* \rightarrow n$  transition. Therefore, according to the literature, the emissions at 497 nm can be assigned to the emission of ligand-to-metal charge transfer (LMCT).

### SI 4: XRPD

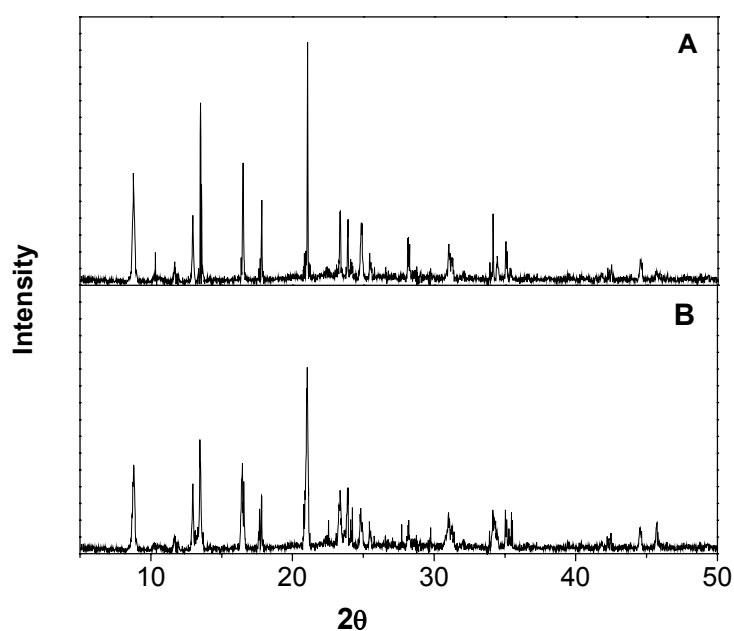

**A:** X-Ray Powder diffraction pattern of as-synthesized **1**.

**B:** X-Ray Powder diffraction pattern of the calcinations product (**1'**) at 120°C for 2h.

It is nearly the same as that of **1**, indicating that the porous network of **1** is retained after the calcinations and removal of guests.

Elemental analysis for calcinated sample (**1'**): C 46.70%; H 2.30%; N 9.13%.

Calculated framework formula of  $[\text{Zn}_2(\text{PDB})_2(4,4'\text{-bpy})]_n$ : C 46.67%; H 2.27%; N 9.07%. Thus, it can be considered that guest water molecular had been removed in the course of calcinations.

Table 1. Crystal data and structure refinement for **1**.

---

|                                   |                                                                                                                      |
|-----------------------------------|----------------------------------------------------------------------------------------------------------------------|
| Identification code               | qc22                                                                                                                 |
| Empirical formula                 | C <sub>24</sub> H <sub>16</sub> N <sub>4</sub> O <sub>9</sub> Zn <sub>2</sub>                                        |
| Formula weight                    | 635.15                                                                                                               |
| Temperature                       | 293(2) K                                                                                                             |
| Wavelength                        | 0.71073 Å                                                                                                            |
| Crystal system, space group       | Monoclinic, C2/c                                                                                                     |
| Unit cell dimensions              | a = 16.069(3) Å    alpha = 90 deg.<br>b = 13.635(3) Å    beta = 111.60(3) deg.<br>c = 11.508(2) Å    gamma = 90 deg. |
| Volume                            | 2344.3(8) Å <sup>3</sup>                                                                                             |
| Z, Calculated density             | 4, 1.800 Mg/m <sup>3</sup>                                                                                           |
| Absorption coefficient            | 2.112 mm <sup>-1</sup>                                                                                               |
| F(000)                            | 1280                                                                                                                 |
| Crystal size                      | 0.423 x 0.374 x 0.331 mm                                                                                             |
| Theta range for data collection   | 2.41 to 27.43 deg.                                                                                                   |
| Limiting indices                  | -20<=h<=20, -17<=k<=17, -14<=l<=14                                                                                   |
| Reflections collected / unique    | 5113 / 2673 [R(int) = 0.0273]                                                                                        |
| Completeness to theta = 27.43     | 99.6 %                                                                                                               |
| Absorption correction             | Semi-empirical from equivalents                                                                                      |
| Max. and min. transmission        | 0.497 and 0.426                                                                                                      |
| Refinement method                 | Full-matrix least-squares on F <sup>2</sup>                                                                          |
| Data / restraints / parameters    | 2673 / 1 / 177                                                                                                       |
| Goodness-of-fit on F <sup>2</sup> | 1.018                                                                                                                |
| Final R indices [I>2sigma(I)]     | R1 = 0.0333, wR2 = 0.1021                                                                                            |
| R indices (all data)              | R1 = 0.0387, wR2 = 0.1068                                                                                            |
| Largest diff. peak and hole       | 1.028 and -0.617 e.Å <sup>-3</sup>                                                                                   |

---

Table 2. Atomic coordinates ( $\times 10^4$ ) and equivalent isotropic displacement parameters ( $\text{\AA}^2 \times 10^3$ ) for **1**.

U(eq) is defined as one third of the trace of the orthogonalized Uij tensor.

|       | x       | y        | z        | U(eq) |
|-------|---------|----------|----------|-------|
| Zn(1) | 3968(1) | 2092(1)  | 9635(1)  | 26(1) |
| N(1)  | 5269(1) | 2236(2)  | 9838(2)  | 28(1) |
| N(2)  | 3319(1) | 1207(1)  | 8123(2)  | 27(1) |
| C(1)  | 5494(2) | 2935(2)  | 9197(3)  | 44(1) |
| C(6)  | 3692(1) | 576(2)   | 7563(2)  | 27(1) |
| C(10) | 2421(2) | 1176(2)  | 7794(2)  | 31(1) |
| C(9)  | 1894(1) | 492(2)   | 6967(2)  | 31(1) |
| O(1W) | 5000    | 4867(3)  | 7500     | 66(1) |
| C(2)  | 6355(2) | 3058(2)  | 9235(3)  | 46(1) |
| C(5)  | 5914(2) | 1645(2)  | 10540(3) | 49(1) |
| C(4)  | 6793(2) | 1727(3)  | 10629(3) | 50(1) |
| C(8)  | 2287(1) | -190(2)  | 6430(2)  | 24(1) |
| C(7)  | 3213(1) | -127(2)  | 6707(2)  | 26(1) |
| C(12) | 1695(1) | -966(2)  | 5602(2)  | 29(1) |
| O(1)  | 1587(1) | -1698(1) | 6214(2)  | 37(1) |
| O(2)  | 1333(2) | -827(2)  | 4475(2)  | 52(1) |
| C(11) | 3701(2) | -774(2)  | 6103(2)  | 31(1) |
| O(3)  | 3379(1) | -1622(1) | 5754(2)  | 35(1) |
| O(4)  | 4361(1) | -450(2)  | 5948(2)  | 53(1) |
| C(3)  | 7031(1) | 2446(2)  | 9965(2)  | 25(1) |

Table 3. Bond lengths [Å] and angles [deg] for 1.

|                     |            |                    |            |
|---------------------|------------|--------------------|------------|
| Zn(1)–O(1)#1        | 1.9573(18) | C(1)–C(2)–C(3)     | 120.1(2)   |
| Zn(1)–O(3)#2        | 1.9659(17) | N(1)–C(5)–C(4)     | 123.0(2)   |
| Zn(1)–N(1)          | 2.025(2)   | C(3)–C(4)–C(5)     | 120.0(2)   |
| Zn(1)–N(2)          | 2.0590(19) | C(9)–C(8)–C(7)     | 118.3(2)   |
| N(1)–C(5)           | 1.327(3)   | C(9)–C(8)–C(12)    | 117.83(19) |
| N(1)–C(1)           | 1.334(3)   | C(7)–C(8)–C(12)    | 123.88(19) |
| N(2)–C(6)           | 1.341(3)   | C(6)–C(7)–C(8)     | 117.96(19) |
| N(2)–C(10)          | 1.350(3)   | C(6)–C(7)–C(11)    | 118.94(19) |
| C(1)–C(2)           | 1.379(4)   | C(8)–C(7)–C(11)    | 123.1(2)   |
| C(6)–C(7)           | 1.387(3)   | O(2)–C(12)–O(1)    | 126.9(2)   |
| C(10)–C(9)          | 1.377(3)   | O(2)–C(12)–C(8)    | 120.3(2)   |
| C(9)–C(8)           | 1.391(3)   | O(1)–C(12)–C(8)    | 112.66(19) |
| C(2)–C(3)           | 1.382(3)   | C(12)–O(1)–Zn(1)#3 | 121.08(16) |
| C(5)–C(4)           | 1.381(3)   | O(4)–C(11)–O(3)    | 123.9(2)   |
| C(4)–C(3)           | 1.381(3)   | O(4)–C(11)–C(7)    | 118.8(2)   |
| C(8)–C(7)           | 1.404(3)   | O(3)–C(11)–C(7)    | 117.3(2)   |
| C(8)–C(12)          | 1.505(3)   | C(11)–O(3)–Zn(1)#4 | 105.44(15) |
| C(7)–C(11)          | 1.509(3)   | C(4)–C(3)–C(2)     | 116.7(2)   |
| C(12)–O(2)          | 1.226(3)   | C(4)–C(3)–C(3)#5   | 121.5(3)   |
| C(12)–O(1)          | 1.269(3)   | C(2)–C(3)–C(3)#5   | 121.8(3)   |
| O(1)–Zn(1)#3        | 1.9573(18) | N(1)–Zn(1)–N(2)    | 109.54(8)  |
| C(11)–O(4)          | 1.222(3)   | C(5)–N(1)–C(1)     | 117.4(2)   |
| C(11)–O(3)          | 1.270(3)   | C(5)–N(1)–Zn(1)    | 123.59(17) |
| O(3)–Zn(1)#4        | 1.9659(17) | C(1)–N(1)–Zn(1)    | 118.95(16) |
| C(3)–C(3)#5         | 1.488(4)   | C(6)–N(2)–C(10)    | 117.75(19) |
| O(1)#1–Zn(1)–O(3)#2 | 111.15(7)  | C(6)–N(2)–Zn(1)    | 127.22(15) |
| O(1)#1–Zn(1)–N(1)   | 103.72(8)  | C(10)–N(2)–Zn(1)   | 114.33(15) |
| O(3)#2–Zn(1)–N(1)   | 133.01(8)  | N(1)–C(1)–C(2)     | 122.9(2)   |
| O(1)#1–Zn(1)–N(2)   | 94.38(8)   | N(2)–C(6)–C(7)     | 123.7(2)   |
| O(3)#2–Zn(1)–N(2)   | 98.37(8)   | N(2)–C(10)–C(9)    | 122.5(2)   |
|                     |            | C(10)–C(9)–C(8)    | 119.7(2)   |

Symmetry transformations used to generate equivalent atoms:

#1  $-x+1/2, y+1/2, -z+3/2$  #2  $x, -y, z+1/2$ #3  $-x+1/2, y-1/2, -z+3/2$  #4  $x, -y, z-1/2$ #5  $-x+3/2, -y+1/2, -z+2$

Table 4. Anisotropic displacement parameters ( $\text{\AA}^2 \times 10^3$ ) for **1**.

The anisotropic displacement factor exponent takes the form:

$$-2 \pi^2 [ h^2 a^{*2} U_{11} + \dots + 2 h k a^* b^* U_{12} ]$$

|       | U11   | U22   | U33   | U23    | U13   | U12    |
|-------|-------|-------|-------|--------|-------|--------|
| Zn(1) | 22(1) | 25(1) | 35(1) | -1(1)  | 15(1) | -1(1)  |
| N(1)  | 18(1) | 33(1) | 34(1) | 6(1)   | 10(1) | -1(1)  |
| N(2)  | 25(1) | 25(1) | 33(1) | -4(1)  | 15(1) | -2(1)  |
| C(1)  | 22(1) | 54(2) | 57(2) | 30(1)  | 15(1) | 9(1)   |
| C(6)  | 23(1) | 28(1) | 34(1) | -2(1)  | 14(1) | 1(1)   |
| C(10) | 26(1) | 32(1) | 38(1) | -6(1)  | 18(1) | 3(1)   |
| C(9)  | 22(1) | 36(1) | 39(1) | -6(1)  | 15(1) | -1(1)  |
| O(1W) | 49(2) | 70(2) | 67(2) | 0      | 10(2) | 0      |
| C(2)  | 26(1) | 56(2) | 57(2) | 35(1)  | 17(1) | 5(1)   |
| C(5)  | 26(1) | 51(2) | 74(2) | 36(2)  | 23(1) | 4(1)   |
| C(4)  | 24(1) | 54(2) | 73(2) | 39(2)  | 18(1) | 8(1)   |
| C(8)  | 23(1) | 24(1) | 26(1) | 3(1)   | 11(1) | 0(1)   |
| C(7)  | 25(1) | 25(1) | 31(1) | -1(1)  | 14(1) | 1(1)   |
| C(12) | 26(1) | 30(1) | 34(1) | -3(1)  | 14(1) | 1(1)   |
| O(1)  | 41(1) | 27(1) | 47(1) | -6(1)  | 23(1) | -11(1) |
| O(2)  | 54(1) | 56(1) | 33(1) | -5(1)  | 3(1)  | 2(1)   |
| C(11) | 30(1) | 33(1) | 32(1) | -5(1)  | 12(1) | 4(1)   |
| O(3)  | 45(1) | 29(1) | 40(1) | -6(1)  | 25(1) | 2(1)   |
| O(4)  | 35(1) | 58(1) | 79(2) | -30(1) | 37(1) | -10(1) |
| C(3)  | 20(1) | 29(1) | 27(1) | 1(1)   | 9(1)  | -3(1)  |

Table 5. Hydrogen coordinates ( $\times 10^4$ ) and isotropic displacement parameters ( $\text{\AA}^2 \times 10^3$ ) for **1**.

|        | x    | y    | z     | U(eq) |
|--------|------|------|-------|-------|
| H(1A)  | 5051 | 3358 | 8703  | 53    |
| H(6A)  | 4307 | 611  | 7761  | 33    |
| H(10A) | 2149 | 1633 | 8137  | 37    |
| H(9A)  | 1279 | 487  | 6770  | 37    |
| H(1)   | 5493 | 5195 | 8201  | 98    |
| H(2A)  | 6481 | 3553 | 8768  | 55    |
| H(5A)  | 5769 | 1154 | 10992 | 59    |
| H(4A)  | 7223 | 1298 | 11137 | 60    |
